# Supplementary material
Source: HighWire-hosted journal article supplement (http://cmajopen.ca/highwire/filestream/80744/field_highwire_adjunct_files/2/open-2013-0040-3-at.pdf)
Supplement: open-2013-0040-3-at.pdf [file open-2013-0040-3-at.pdf]

## **Appendix 3 (as supplied by authors): high-quality clinical practice guidelines (CPGs) identified by topic**

### **Diabetes**

- Canadian Diabetes Association Clinical Practice Guidelines Expert Committee. (2008, September). Canadian Diabetes Association 2008 clinical practice guidelines for the prevention and management of diabetes in Canada. *Canadian Journal of Diabetes*, 32(Supp1), S1-S201. Available from: [www.diabetes.ca/for-professionals/resources/2008-cpg/](http://www.diabetes.ca/for-professionals/resources/2008-cpg/)
- American Diabetes Association. (2010). American Diabetes Association clinical practice recommendations 2009. *Diabetes Care* 32(Supp 1), S1-S96. Available from: [http://care.diabetesjournals.org/content/33/Supplement\\_1](http://care.diabetesjournals.org/content/33/Supplement_1)
- U.S. Preventive Services Task Force. (2008, June). Screening for type 2 diabetes mellitus in adults. Agency for Healthcare Research and Quality. Available from: <http://www.ahrq.gov/Clinic/uspstf08/type2/type2rs.htm>

### **Cardiovascular**

- Scottish Intercollegiate Guidelines Network (SIGN). (2007). Risk estimation and the prevention of cardiovascular disease: A national clinical guideline. Available from: <http://www.sign.ac.uk/guidelines/fulltext/97/index.html>
- Canadian Cardiovascular Society (CCS). (2009). 2009 Canadian Cardiovascular Society/Canadian guidelines for the diagnosis and treatment of dyslipidemia and prevention of cardiovascular disease in the adult: 2009 recommendations. *Canadian Journal of Cardiology*, 25(10), 567-579. Available from: [http://www.ccs.ca/download/consensus\\_conference/consensus\\_conference\\_archives/2009\\_Dyslipidemia-Guidelines.pdf](http://www.ccs.ca/download/consensus_conference/consensus_conference_archives/2009_Dyslipidemia-Guidelines.pdf)

### **Cancer - Breast, Colorectal, Cervical, Skin, and Lung**

- U.S. Preventive Services Task Force. (2009, November 17). Screening for Breast Cancer: U.S. Preventive Services Task Force Recommendation Statement. *Annals of Internal Medicine* 151(10), 716-726. Available from: <http://www.annals.org/content/151/10/716.full>
- Agency for Healthcare Research and Quality (AHRQ). (2009). The guide to clinical preventive services 2009: Recommendations of the United States Preventive Services Task Force. Available from: <http://www.ahrq.gov/clinic/pocketgd09/pocketgd09.pdf>
- Institute for Clinical Systems Improvement (ICSI). (2009, October). Health care guideline: Preventive services for adults. Available from: [http://www.icsi.org/preventive\\_services\\_for\\_adults/preventive\\_services\\_for\\_adults\\_4.html](http://www.icsi.org/preventive_services_for_adults/preventive_services_for_adults_4.html)
- New Zealand Guidelines Group. (2009). Suspected cancer in primary care: Guidelines for investigation, referral and reducing ethnic disparities. Available from: [http://www.nzgg.org.nz/guidelines/0158/suspected\\_cancer\\_guideline\\_web.pdf](http://www.nzgg.org.nz/guidelines/0158/suspected_cancer_guideline_web.pdf)
- McLachlin, C.M., Mai, V., Murphy, J., Fung Kee Fung, M., Chambers, A. and members of the Cervical Screening Guidelines Development Committee of the Ontario Cervical Screening Program and the Gynecology Cancer Disease

Appendix to: Campbell-Scherer D, Rogers J, Manca M, et al. Guideline harmonization and implementation plan for the BETTER trial: Building on Existing Tools to Improve Chronic Disease Prevention and Screening in Family Practice.

*CMAJ Open* 2014. DOI: 10.9778/cmajo.20130040.

Copyright © 2014 The Author(s) or their employer(s).

To receive this resource in an accessible format, please contact us at [cmajgroup@cmaj.ca](mailto:cmajgroup@cmaj.ca).

- Site Group of Cancer Care Ontario. (2005, May 20). Cervical screening: Practice guidelines report. Program in Evidence-Based Care, A Cancer Care Ontario Program. Available from:  
[http://www.cancercare.on.ca/pdf/pebc\\_cervical\\_screen\\_s.pdf](http://www.cancercare.on.ca/pdf/pebc_cervical_screen_s.pdf)
- U.S. Preventive Services Task Force. (2008, November 4). Screening for Colorectal Cancer: U.S. Preventive Services Task Force recommendation statement. *Annals of Internal Medicine* 149(9) 627-663. Available from:  
<http://www.annals.org/content/149/9/627.full>
  - American College of Chest Physicians. (2007). Diagnosis and management of lung cancer: ACCP guidelines, 2nd ed. Available from:  
[http://chestjournal.chestpubs.org/content/132/3\\_suppl](http://chestjournal.chestpubs.org/content/132/3_suppl)
  - U.S. Preventive Services Task Force. (2009, February 3) Screening for skin cancer: U.S. Preventive Services Task Force recommendation statement. *Annals of Internal Medicine* 150(3), 188-193. Available from:  
<http://www.annals.org/content/150/3/188.full.pdf+html>
  - New Zealand Guidelines Group. (2008). Clinical practice guidelines in Australia and New Zealand for the management of melanoma. Available from: [http://www.nzgg.org.nz/guidelines/0141/Melanoma\\_Full\\_GL.pdf](http://www.nzgg.org.nz/guidelines/0141/Melanoma_Full_GL.pdf)

### **Lifestyle**

- Agency for Healthcare Research and Quality (AHRQ). (2009). The guide to clinical preventive services 2009: Recommendations of the United States Preventive Services Task Force. Available from:  
<http://www.ahrq.gov/clinic/pocketgd09/pocketgd09.pdf>

Guidelines selected for Cancer, Cardiovascular Disease, and Diabetes with recommendations on lifestyle:

- Canadian Diabetes Association Clinical Practice Guidelines Expert Committee. (2008, September). Canadian Diabetes Association 2008 clinical practice guidelines for the prevention and management of diabetes in Canada. *Canadian Journal of Diabetes*, 32(Supp1), S1-S201. Available from:  
[www.diabetes.ca/for-professionals/resources/2008-cpg/](http://www.diabetes.ca/for-professionals/resources/2008-cpg/)
- American Diabetes Association. (2010). American Diabetes Association clinical practice recommendations 2010. *Diabetes Care* 33(Supp 1), S1-S98. Available from: [http://care.diabetesjournals.org/content/33/Supplement\\_1](http://care.diabetesjournals.org/content/33/Supplement_1)
- U.S. Preventive Services Task Force. (2008, June). Screening for type 2 diabetes mellitus in adults. Agency for Healthcare Research and Quality. Available from: <http://www.ahrq.gov/Clinic/uspstf08/type2/type2rs.htm>
- Scottish Intercollegiate Guidelines Network (SIGN). (2007). Risk estimation and the prevention of cardiovascular disease: A national clinical guideline. Available from: <http://www.sign.ac.uk/guidelines/fulltext/97/index.html>

### **Family History**

Guidelines selected for Cancer, Cardiovascular Disease, Diabetes and Lifestyle with recommendations on family history:

- Institute for Clinical Systems Improvement (ICSI). (2009, October). Health care guideline: Preventive services for adults. Available from:  
[http://www.icsi.org/preventive\\_services\\_for\\_adults/preventive\\_services\\_for\\_adults\\_4.html](http://www.icsi.org/preventive_services_for_adults/preventive_services_for_adults_4.html)

- Agency for Healthcare Research and Quality (AHRQ). (2009). The guide to clinical preventive services 2009: Recommendations of the United States Preventive Services Task Force. Available from: <http://www.ahrq.gov/clinic/pocketgd09/pocketgd09.pdf>
- New Zealand Guidelines Group. (2008). Clinical practice guidelines in Australia and New Zealand for the management of melanoma. Available from: [http://www.nzgg.org.nz/guidelines/0141/Melanoma\\_Full\\_GL.pdf](http://www.nzgg.org.nz/guidelines/0141/Melanoma_Full_GL.pdf)
- Scottish Intercollegiate Guidelines Network (SIGN). (2007). Risk estimation and the prevention of cardiovascular disease: A national clinical guideline. Available from: <http://www.sign.ac.uk/guidelines/fulltext/97/index.html>

#### Selected Systematic Reviews on Family History:

- Wilson BJ, Qureshi N, Santaguida P, Little J, Carroll JC, Allanson J, Raina P. (2009). Systematic review: Family history in risk assessment for common diseases. *Ann Int Med*;151:878-885. Available from: <http://www.annals.org/content/early/2009/11/02/0003-4819-151-12-200912150-00177.full>
- Agency for Healthcare Research and Quality (AHRQ) (2009). Family history and improving health. Evidence Report/Technology Assessment No 186. Available from: <http://www.ahrq.gov/downloads/pub/evidence/pdf/famhistory/famhimp.pdf>
- Plat AW, Kroon AA, Van Schayck CP, De Leeuw PW, Stoffers HE. (2009). Obtaining the family history for common, multifactorial diseases by family physicians. A descriptive systematic review. *European Journal of General Practice*;15:231-242.
- Agency for Healthcare Research and Quality (AHRQ) (2009). Clinical utility of cancer family history collection in primary care. Available from: <http://www.ahrq.gov/downloads/pub/evidence/pdf/famhistory/famhist2.pdf>

### **Mental Health**

Guidelines selected for Cancer, Cardiovascular Disease, Diabetes and Lifestyle with recommendations related to mental health:

- American College of Chest Physicians. (2007). Diagnosis and management of lung cancer: ACCP guidelines, 2nd ed. Available from: [http://chestjournal.chestpubs.org/content/132/3\\_suppl](http://chestjournal.chestpubs.org/content/132/3_suppl)
- Scottish Intercollegiate Guidelines Network (SIGN). (2007). Risk estimation and the prevention of cardiovascular disease: A national clinical guideline. Available from: <http://www.sign.ac.uk/guidelines/fulltext/97/index.html>
- Canadian Diabetes Association Clinical Practice Guidelines Expert Committee. (2008, September). Canadian Diabetes Association 2008 clinical practice guidelines for the prevention and management of diabetes in Canada. *Canadian Journal of Diabetes*, 32(Supp1), S1-S201. Available from: [www.diabetes.ca/for-professionals/resources/2008-cpg/](http://www.diabetes.ca/for-professionals/resources/2008-cpg/)
- American Diabetes Association. (2010). American Diabetes Association clinical practice recommendations 2009. *Diabetes Care* 32(Supp 1), S1-S96. Available from: [http://care.diabetesjournals.org/content/33/Supplement\\_1](http://care.diabetesjournals.org/content/33/Supplement_1)
